# Supplementary material for: Transition of an estuarine benthic meiofauna assemblage 1.7 and 2.8 years after a mining disaster
Source: PeerJ. 2023 Mar 14;11:e14992. doi: 10.7717/peerj.14992 (PMC10022502; doi:10.7717/peerj.14992)
Supplement: Supplemental Information 1 — Number of sequence variant reads from meiofaunal taxa from the Rio Doce estuary in August 2018, distributed across sampled sites. [file peerj-11-14992-s001.xlsx]

## Sheet: Planilha1
	ST 4	ST 6	ST 8	ST 9	ST 11	ST 13	ST 14	ST 15	ST 18	ST 19
d__Eukaryota;p__Annelida;__;__;__;__	0	0	0	1898.5	336.5	0	220.5	0	168.5	0
d__Eukaryota;p__Annelida;c__Clitellata;o__Haplotaxida;f__Haplotaxida;g__Haplotaxida	0	0	0	31.5	826.5	31.5	249	87.5	149	24.5
d__Eukaryota;p__Annelida;c__Polychaeta;o__Spionida;f__Spionida;g__Spionida	0	0	0	0	0	58	0	0	0	0
d__Eukaryota;p__Arthropoda;__;__;__;__	1898.5	1233.5	59.5	1675.5	24	715.5	703	1645.5	331	551.5
d__Eukaryota;p__Arthropoda;c__Branchiopoda;__;__;__	0	7	0	0	0	4	59	0	33	9
d__Eukaryota;p__Arthropoda;c__Branchiopoda;o__Diplostraca;f__Diplostraca;g__Diplostraca	0	0	0	0	0	0	0	0	1.5	0
d__Eukaryota;p__Arthropoda;c__Malacostraca;o__Eucarida;f__Eucarida;g__Eucarida	0	0	0	5.5	0	0	0	0	0	3
d__Eukaryota;p__Arthropoda;c__Maxillopoda;__;__;__	10.5	3.5	2660.5	9	211.5	176	0	70	16	43
d__Eukaryota;p__Arthropoda;c__Maxillopoda;o__Calanoida;f__Calanoida;g__Calanoida	0	0	0	0	0	0	0	0	0	0
d__Eukaryota;p__Arthropoda;c__Maxillopoda;o__Copepoda;f__Copepoda;g__Copepoda	0	0	0	0	0	0	0	0	0	0
d__Eukaryota;p__Arthropoda;c__Maxillopoda;o__Cyclopoida;f__Cyclopoida;g__Cyclopoida	0	0	24.5	0	0	11	5.5	0	198.5	18
d__Eukaryota;p__Arthropoda;c__Maxillopoda;o__Harpacticoida;f__Harpacticoida;g__Harpacticoida	3.5	0	0	0	0	23.5	21	0	10.5	0
d__Eukaryota;p__Arthropoda;c__Ostracoda;o__Halocyprida;f__Halocyprida;g__Halocyprida	8	0	0	0	0	0	0	0	0	0
d__Eukaryota;p__Arthropoda;c__Ostracoda;o__Podocopida;f__Podocopida;g__Podocopida	812.5	1103	481.5	0	468	67	23	691.5	6525	1324.5
d__Eukaryota;p__Bryozoa;c__Gymnolaemata;__;__;__	0	0	0	0	0	0	0	0	0	0
d__Eukaryota;p__Bryozoa;c__Phylactolaemata;o__Plumatellida;f__Plumatellida;g__Plumatellida	0	0	0	14	0	0	0	0	24	0
d__Eukaryota;p__Cnidaria;c__Hydrozoa;__;__;__	0	0	0	0	0	0	4.5	0	0	0
d__Eukaryota;p__Cnidaria;c__Hydrozoa;o__Anthoathecata;f__Anthoathecata;g__Anthoathecata	0	0	0	0	0	7.5	0	0	0	0
d__Eukaryota;p__Cnidaria;c__Hydrozoa;o__Limnomedusae;f__Limnomedusae;g__Limnomedusae	0	0	0	311.5	61	13	575	0	147	0
d__Eukaryota;p__Cnidaria;c__Myxozoa;o__Bivalvulida;f__Bivalvulida;g__Bivalvulida	0	0	0	23.5	0	1.5	6	0	0	3.5
d__Eukaryota;p__Gastrotricha;c__Gastrotricha;o__Chaetonotida;f__Chaetonotida;g__Chaetonotida	0	0	0	44	0	0	4	0	5.5	0
d__Eukaryota;p__Mollusca;c__Bivalvia;__;__;__	0	0	0	21.5	0	13.5	0	0	0	2.5
d__Eukaryota;p__Mollusca;c__Bivalvia;o__Veneroida;f__Veneroida;g__Veneroida	0	0	4.5	45.5	1018.5	0	208	0	1.5	0
d__Eukaryota;p__Mollusca;c__Mollusca;o__Mollusca;f__Mollusca;g__Mollusca	0	0	0	1	0	0	0	0	0	0
d__Eukaryota;p__Nematozoa;c__Chromadorea;__;__;__	0	0	0	0	24.5	0	17.5	0	0	0
d__Eukaryota;p__Nematozoa;c__Chromadorea;o__Desmodorida;f__Desmodorida;g__Desmodorida	0	0	8.5	0	0	32	0	25	0	38
d__Eukaryota;p__Nematozoa;c__Chromadorea;o__Monhysterida;f__Monhysterida;g__Monhysterida	257	335.5	33.5	62.5	3	766	64.5	99.5	34.5	392
d__Eukaryota;p__Nematozoa;c__Chromadorea;o__Tylenchida;f__Tylenchida;g__Tylenchida	0	0	0	0	0	0	0	0	0	7
d__Eukaryota;p__Nematozoa;c__Enoplea;o__Dorylaimia;f__Dorylaimida;g__Dorylaimida	57	16	24	30	37.5	7	45.5	16.5	63	15.5
d__Eukaryota;p__Nematozoa;c__Enoplea;o__Dorylaimia;f__Mermithida;g__Mermithida	0	0	1	0	0	0	16.5	0	297	3.5
d__Eukaryota;p__Nematozoa;c__Enoplea;o__Enoplida;f__Enoplida;g__Enoplida	2.5	0	0	0	58	8.5	0	0	1.5	0
d__Eukaryota;p__Nematozoa;c__Enoplea;o__Triplonchida;f__Triplonchida;g__Triplonchida	39	7.5	0	16	111	0	9.5	0	64	6
d__Eukaryota;p__Nemertea;c__Anopla;o__Heteronemertea;f__Heteronemertea;g__Heteronemertea	0	0	0	0	2643.5	0	0	0	0	0
d__Eukaryota;p__Nemertea;c__Enopla;o__Monostilifera;f__Monostilifera;g__Monostilifera	0	0	0	0	42	0	0	0	0	0
d__Eukaryota;p__Platyhelminthes;__;__;__;__	44	27.5	1.5	9	40	0	132	0	18	7.5
d__Eukaryota;p__Platyhelminthes;c__Catenulida;o__Catenulida;f__Stenostomidae;g__Stenostomidae	0	0	9	0	0	0	130.5	0	0	0
d__Eukaryota;p__Platyhelminthes;c__Monogenea;o__Monopisthocotylea;f__Ancylodiscoididae;g__Ancylodiscoididae	43.5	4	0	0	0	0	0	0	0	0
d__Eukaryota;p__Platyhelminthes;c__Rhabditophora;o__Macrostomida;f__Macrostomida;g__Macrostomida	0	0	0	0	894	0	0	0	0	0
d__Eukaryota;p__Platyhelminthes;c__Rhabditophora;o__Rhabdocoela;f__Kalyptorhynchia;g__Kalyptorhynchia	0	13.5	0	171.5	0	2.5	16	0	0	2
d__Eukaryota;p__Platyhelminthes;c__Rhabditophora;o__Rhabdocoela;f__Neodalyellida;g__Neodalyellida	0	0	0	0	0	0	9	0	0	0
d__Eukaryota;p__Platyhelminthes;c__Rhabditophora;o__Seriata;f__Seriata;g__Seriata	0	0	0	0	0	0	15.5	0	0	0
d__Eukaryota;p__Platyhelminthes;c__Trematoda;__;__;__	2	78.5	0	0	0	0	0	0	0	0
d__Eukaryota;p__Rotifera;c__Bdelloidea;__;__;__	0	0	60.5	3734	374.5	27	1402.5	33.5	1105	10.5
d__Eukaryota;p__Rotifera;c__Bdelloidea;o__Adinetida;f__Adinetida;g__Adinetida	0	0	0	24.5	0	0	0	0	0	0
d__Eukaryota;p__Rotifera;c__Bdelloidea;o__Philodinida;f__Philodinida;g__Philodinida	0	0	12	0	0	28	0	0	0	0
d__Eukaryota;p__Rotifera;c__Monogononta;__;__;__	0	0	23.5	56	0	9.5	126	0	58	0
d__Eukaryota;p__Rotifera;c__Monogononta;o__Ploimida;f__Ploimida;g__Ploimida	0	17.5	0	0	0	0	0	0	0	0
