# Supplementary material for: Transition of an estuarine benthic meiofauna assemblage 1.7 and 2.8 years after a mining disaster
Source: PeerJ. 2023 Mar 14;11:e14992. doi: 10.7717/peerj.14992 (PMC10022502; doi:10.7717/peerj.14992)
Supplement: Supplemental Information 2 — Raw data (per sampled station) of sedimentary variables obtained from sediment samples from the Rio Doce estuary 2017 and 2018 assessments. [file peerj-11-14992-s002.xlsx]

## Sheet: Planilha1
Station	Year	%Sand	TOM	Al	As	Ba	Cd	Co	Cr	Cu	Fe	Mn	Ni	Pb	Zn
ST4	2018	0.925	1.9	23611.4	1.93794	30.4698	2.03562	6.72766	25.6376	5.50505	16726.5	263.57	10.7676	5.78194	25.9465
ST6	2018	0.83	8.4	23137.2	2.22316	27.3881	2.34154	5.99952	24.0509	5.62043	14526.5	247.841	10.171	5.53119	26.7688
ST8	2018	0.898	4.1	17342.9	8.65026	176.932	1.40302	9.14436	26.793	2.32717	19294.3	225.739	11.0915	9.50698	44.4632
ST9	2018	0.806	4.5	13181.9	3.78875	94.5045	0.739512	5.93701	19.8337	1.83434	11751.7	319.786	7.80151	6.94394	15.0421
ST11	2018	0.936	11.8	16827.3	4.6733	58.6451	0.899563	5.84186	20.7955	2.4509	15188.3	381.932	8.27143	5.16324	17.7466
ST13	2018	0.935	1.8	22328.5	10.9729	118.581	2.63341	9.4434	42.8882	4.63105	26848.2	497.176	12.4737	8.06924	34.2771
ST14	2018	0.586	4.4	19429.3	6.20866	88.5173	2.2874	8.5208	25.082	3.39106	23348.6	455.824	11.3618	8.46124	33.8228
ST15	2018	0.812	4.3	18989.8	7.34335	48.8246	1.68194	8.03366	28.0654	4.44432	15861.8	430.16	12.0538	6.69992	32.3575
ST18	2018	0.941	2.3	19467	2.02471	97.6305	1.27487	6.6764	22.4659	3.59234	13435.7	396.121	9.63491	6.52189	21.4659
ST19	2018	0.803	3.4	26656.4	5.08396	54.5221	2.58729	9.26168	30.4704	6.33096	19629.6	357.2	14.874	8.24788	35.9998
ST4	2017	0.897646	2.1	26880.6	4.48963	486.337	3.1028	8.39823	40.8128	6.67517	33680.9	661.995	12.845	173.295	30.0477
ST6	2017	0.558991	13.4	25331.7	-2.45455	35.9156	0.576349	3.82515	17.9834	4.5968	13282.1	148.706	7.27195	5.55225	18.2896
ST8	2017	0.961943	1.5	35594.7	-2.54201	675.546	2.13459	6.5161	24.2003	3.26288	21418.7	627.096	8.79372	134.775	18.2435
ST9	2017	0.907885	5.2	30108.4	28.7681	304.587	2.94869	9.40284	41.9925	6.71242	28155	503.625	12.572	111.38	32.7933
ST11	2017	0.697565	13.8	40184.8	-1.50008	115.796	3.99388	10.651	54.574	14.4173	43116.3	356.284	18.7178	67.2862	48.629
ST13	2017	0.910701	2.4	64597.1	1.28112	393.726	7.06647	19.1515	71.116	14.199	54983.3	1002.73	26.1954	117.276	78.0844
ST14	2017	0.862494	6	38847.9	-4.7281	208.362	2.73906	7.47973	30.565	7.65501	27919.7	247.365	12.2329	30.3132	32.2923
ST15	2017	0.851473	3.9	37060	16.7121	203.815	4.50235	13.2869	57.82	8.79159	34531.6	638.087	19.8209	78.2152	49.3597
ST18	2017	0.878104	3.2	10713.9	11.1843	228.769	4.20452	11.3	60.4917	11.4669	37781.3	981.468	15.7377	160.776	43.3613
ST19	2017	0.92816	2.3	29766.9	3.68204	314.856	3.17629	8.79569	41.9059	9.69671	36244.4	561.919	13.7259	118.023	31.5086
